# Supplementary material for: The Cynomolgus Macaque MHC Polymorphism in Experimental Medicine
Source: Cells. 2019 Aug 26;8(9):978. doi: 10.3390/cells8090978 (PMC6770713; doi:10.3390/cells8090978)
Supplement: Supplementary file 1 [file cells-08-00978-s001.xlsx]

## Sheet: Table1
Supplementary Table 1. Comparison of non-MHC loci in the MHC genomic region between human and cynomolgus macaque
Human					Cynomolgus Macaque
Gene symbol	Gene type	Description	GeneID		Gene symbol	GeneID
EXTENDED CLASS I REGION
GABBR1	protein coding	gamma-aminobutyric acid (GABA) B receptor, 1	2550		GABBR1	101925799
MOG	protein coding	myelin oligodendrocyte glycoprotein	4340		MOG	102118842
ZFP57	protein coding	ZFP57 zinc finger protein	346171		LOC711428	102121260
CLASS I REGION
ZNRD1	protein coding	zinc ribbon domain containing 1	30834		ZNRD1	102115118
PPP1R11	protein coding	protein phosphatase 1, regulatory (inhibitor) subunit 11	6992		PPP1R11	101925924
RNF39	protein coding	ring finger protein 39	80352		RNF39	102147030
TRIM31	protein coding	tripartite motif-containing 31	11074		TRIM31	102145416
TRIM40	protein coding	tripartite motif-containing 40	135644		TRIM40	102145288
TRIM10	protein coding	tripartite motif-containing 10	10107		TRIM10	102144288
TRIM15	protein coding	tripartite motif-containing 15	89870		TRIM15	102144911
TRIM26	protein coding	tripartite motif-containing 26	7726		TRIM26	102143132
TRIM39	protein coding	tripartite motif-containing 39	56658		TRIM39	102143906
RPP21	protein coding	ribonuclease P/MRP 21kDa subunit	79897		RPP21	102140893
GNL1	protein coding	guanine nucleotide binding protein-like 1	2794		GNL1	101926006
PRR3	protein coding	proline-rich polypeptide 3	80742		PRR3	102137863
ABCF1	protein coding	ATP-binding cassette, sub-family F (GCN20), member 1	23		ABCF1	102136607
PPP1R10	protein coding	protein phosphatase 1, regulatory (inhibitor) subunit 10	5514		PPP1R10	102136211
MRPS18B	protein coding	mitochondrial ribosomal protein S18B	28973		MRPS18B	101865980
ATAT1	protein coding	alpha tubulin acetyltransferase 1	79969		ATAT1	102135176
C6orf136	protein coding	chromosome 6 open reading frame 136	221545		C4H6orf136	102135556
DHX16	protein coding	DEAD/H (Asp-Glu-Ala-Asp/His) box polypeptide 16	8449		DHX16	102133544
PPP1R18	protein coding	protein phosphatase 1, regulatory subunit 18	170954		PPP1R18	102131108
NRM	protein coding	nurim (nuclear envelope membrane protein)	11270		NRM	102131771
MDC1	protein coding	mediator of DNA damage checkpoint 1	9656		MDC1	102127886
TUBB	protein coding	tubulin, beta class I	203068		TUBB	101925816
FLOT1	protein coding	flotillin 1	10211		FLOT1	101926288
IER3	protein coding	immediate early response 3	8870		IER3	102126257
DDR1	protein coding	discoidin domain receptor tyrosine kinase 1	780		DDR1	102123648
GTF2H4	protein coding	eneral transcription factor IIH, polypeptide 4, 52kDa	2968		GTF2H4	101926545
VARS2	protein coding	valyl-tRNA synthetase 2, mitochondrial	57176		VARS2	102121127
SFTA2	protein coding	surfactant associated 2	389376		SFTA2	102119593
MUCL3	protein coding	diffuse panbronchiolitis critical region 1	135656		MUCL3	102119979
MUC21	protein coding	mucin 21, cell surface associated	394263		MUC21	102120364
MUC22	protein coding	mucin 22	100507679		MUC22	102120738
C6orf15	protein coding	chromosome 6 open reading frame 15	29113		C4H6orf15	102119224
PSORS1C1	protein coding	psoriasis susceptibility 1 candidate 1	170679		X	X
CDSN	protein coding	corneodesmosin	1041		CDSN	102118455
PSORS1C2	protein coding	psoriasis susceptibility 1 candidate 2	170680		PSORS1C2	102118088
CCHCR1	protein coding	coiled-coil alpha-helical rod protein 1	54535		CCHCR1	102115497
TCF19	protein coding	transcription factor 19 (SC1)	6941		TCF19	102146049
POU5F1	protein coding	POU domain, class 5, transcription factor 1	5460		POU5F1	102115117
CLASS III REGION
MCCD1	protein coding	mitochondrial coiled-coil domain 1	401250		MCCD1	102140246
DDX39B	protein coding	DEAD (Asp-Glu-Ala-Asp) box polypeptide 39B	7919		DDX39B	101865332
ATP6V1G2	protein coding	ATPase, H+ transporting, lysosomal 13kDa, V1 subunit G isoform 2	534		ATP6V1G2	101926631
NFKBIL1	protein coding	nuclear factor of kappa light polypeptide gene enhancer	4795		NFKBIL1	102136863
LTA	protein coding	lymphotoxin alpha	4049		LTA	102138497
TNF	protein coding	tumor necrosis factor	7124		TNF	102139631
LTB	protein coding	lymphotoxin beta	4050		LTB	102135554
LST1	protein coding	leukocyte specific transcript 1	7940		LST1	102133282
NCR3	protein coding	natural cytotoxicity triggering receptor 3	259197		NCR3	102133932
AIF1	protein coding	allograft inflammatory factor 1	199		AIF1	102132908
PRRC2A	protein coding	proline-rich coiled-coil 2A	7916		PRRC2A	101866002
BAG6	protein coding	BCL2-associated athanogene 6	7917		LOC715163	102126896
APOM	protein coding	apolipoprotein M	55937		APOM	102131388
C6orf47	protein coding	chromosome 6 open reading frame 47	57827		C4H6orf47	102126525
GPANK1	protein coding	G patch domain and ankyrin repeats 1	7918		GPANK1	102123528
CSNK2B	protein coding	casein kinase 2, beta polypeptide	1460		CSNK2B	102125227
LY6G5B	protein coding	lymphocyte antigen 6 complex, locus G5B	58496		LY6G5B	102126124
LY6G5C	protein coding	lymphocyte antigen 6 complex, locus G5C	80741		LY6G5C	102117849
ABHD16A	protein coding	abhydrolase domain containing 16A	7920		ABHD16A	101866118
LY6G6F	protein coding	lymphocyte antigen 6 complex, locus G6F	259215		X	X
LY6G6D	protein coding	lymphocyte antigen 6 complex, locus G6D	58530		LOC102119090	102119090
LY6G6C	protein coding	lymphocyte antigen 6 complex, locus G6C	80740		LY6G6C	102120984
MPIG6B	protein coding	megakaryocyte and platelet inhibitory receptor G6b	80739		MPIG6B	102121358
DDAH2	protein coding	dimethylarginine dimethylaminohydrolase 2	23564		DDAH2	102117010
CLIC1	protein coding	chloride intracellular channel 1	1192		CLIC1	102116383
MSH5	protein coding	mutS homolog 5	4439		MSH5	102145919
SAPCD1	protein coding	suppressor APC domain containing 1	401251		SAPCD1	102116006
VWA7	protein coding	von Willebrand factor A domain containing 7	80737		VWA7	102145286
VARS	protein coding	valyl-tRNA synthetase	7407		VARS	101866177
LSM2	protein coding	LSM2 homolog, U6 small nuclear RNA associated	57819		LSM2	102144654
HSPA1L	protein coding	heat shock 70kDa protein 1-like	3305		HSPA1L	101926012
HSPA1A	protein coding	heat shock 70kDa protein 1A	3303		LOC101925240	101925240
HSPA1B	protein coding	heat shock 70kDa protein 1B	3304
C6orf48	protein coding	chromosome 6 open reading frame 48	50854		LOC102143138	102143138
NEU1	protein coding	sialidase 1 (lysosomal sialidase)	4758		NEU1	102138135
SLC44A4	protein coding	solute carrier family 44, member 4	80736		SLC44A4	102138495
EHMT2	protein coding	euchromatic histone-lysine N-methyltransferase 2	10919		EHMT2	102139754
ZBTB12	protein coding	zinc finger and BTB domain containing 12	221527		ZBTB12	102136733
C2	protein coding	complement component 2	717		C2	102137096
CFB	protein coding	complement factor B	629		CFB	102133787
NELFE	protein coding	negative elongation factor complex member E	7936		NELFE	102134460
SKIV2L	protein coding	superkiller viralicidic activity 2-like	6499		SKIV2L	101925303
DXO	protein coding	decapping exoribonuclease	1797		DXO	102132769
STK19	protein coding	serine/threonine kinase 19	8859		STK19	102133146
C4A	protein coding	complement component 4B (Rodgers blood group)	720		X	X
C4B	protein coding	complement component 4B (Chido blood group)	721		LOC102132156	102132156
CYP21A2	protein coding	cytochrome P450, family 21, subfamily A, polypeptide 2	1589		LOC102130610	102130610
TNXB	protein coding	tenascin XB	7148		TNXB	102131497
ATF6B	protein coding	activating transcription factor 6 beta	1388		ATF6B	102129446
FKBPL	protein coding	FK506 binding protein like	63943		FKBPL	101864936
PRRT1	protein coding	proline-rich transmembrane protein 1	80863		PRRT1	102123915
PPT2	protein coding	palmitoyl-protein thioesterase 2	9374		PPT2	102124313
EGFL8	protein coding	EGF-like-domain, multiple 8	80864		EGFL8	102125225
AGPAT1	protein coding	1-acylglycerol-3-phosphate O-acyltransferase 1	10554		AGPAT1	101865968
RNF5	protein coding	ring finger protein 5, E3 ubiquitin protein ligase	6048		RNF5	102120498
AGER	protein coding	advanced glycosylation end product-specific receptor	177		AGER	102121124
PBX2	protein coding	pre-B-cell leukemia transcription factor 2	5089		PBX2	102123261
GPSM3	protein coding	G-protein signaling modulator 3	63940		GPSM3	102120112
NOTCH4	protein coding	Notch homolog 4	4855		NOTCH4	101866845
TSBP1	protein coding	testis expressed basic protein 1	10665		TSBP1	101925665
BTNL2	protein coding	butyrophilin-like 2	56244		X	X
CLASS II REGION
TAP2	protein coding	transporter 2, ATP-binding cassette, sub-family B (MDR/TAP)	6891		TAP2	102143391
PSMB8	protein coding	proteasome subunit, beta type, 8 (large multifunctional protease 7)	5696		PSMB8	102141301
TAP1	protein coding	transporter 1, ATP-binding cassette, sub-family B (MDR/TAP)	6890		TAP1	102142346
PSMB9	protein coding	proteasome subunit, beta type, 9 (large multifunctional protease 2)	5698		PSMB9	102142733
BRD2	protein coding	bromodomain containing 2	6046		BRD2	101865351
EXTENDED CLASS II REGION
COL11A2	protein coding	collagen, type XI, alpha 2	1302		COL11A2	102135302
RXRB	protein coding	retinoid X receptor, beta	6257		LOC717368	102132522
SLC39A7	protein coding	solute carrier family 39 (zinc transporter), member 7	7922		SLC39A7	102133931
HSD17B8	protein coding	hydroxysteroid (17-beta) dehydrogenase 8	7923		HSD17B8	102134563
RING1	protein coding	ring finger protein 1	6015		RING1	102132155
VPS52	protein coding	vacuolar protein sorting 52 homolog	6293		VPS52	102130748
RPS18	protein coding	ribosomal protein S18	6222		RPS18	102130349
B3GALT4	protein coding	UDP-Gal:betaGlcNAc beta 1,3-galactosyltransferase, polypeptide 4	8705		B3GALT4	101867339
WDR46	protein coding	WD repeat domain 46	9277		WDR46	101865582
PFDN6	protein coding	prefoldin subunit 6	10471		PFDN6	102129073
RGL2	protein coding	RAB2, member RAS oncogene family-like	5863		RGL2	102126524
TAPBP	protein coding	TAP binding protein (tapasin)	6892		TAPBP	102124831
ZBTB22	protein coding	zinc finger and BTB domain containing 22	9278		ZBTB22	102125486
DAXX	protein coding	death-domain associated protein	1616		DAXX	101866078
KIFC1	protein coding	kinesin family member C1	3833		KIFC1	102122896
